# Supplementary material for: A study protocol comprising educational interventions to improve HPV vaccination coverage among adolescents
Source: Research Square preprint supplement (doi:10.21203/rs.3.rs-7771163/v1), 2025-11-19
Supplement: Supplementary file 1 [file 418b3d187a243a128fe68971.docx]

**Supplementary data. Description of collected data. Data collected from questionnaires at T0 (before any intervention), at T1 (between 15 days and one month after the intervention) and at T2 (six to eight months after the intervention).**

**At T0, before any intervention**, the data collected relate to:

- - General knowledge of vaccinations (Q0): compulsory vaccinations, vaccination coverage, perception of vaccination (Hepatitis B, Covid, etc.),
  - Socio-demographic characteristics (Q1): sex, age, composition of siblings, place of residence), and data related to sources of information about health and general health status (follow-up by a general practitioner, prior consultation about HPV vaccines),
  - General knowledge of the HPV vaccine and HPV-related diseases (Q2): HPV, cervical cancer and HPV-related diseases, the HPV vaccine,
  - Vaccination status (Q3) or willingness to be vaccinated,
  - Specific knowledge of the HPV vaccine and HPV-related diseases (Q4): the causes of the different types of cancer caused by HPV, how HPV is transmitted, the most effective methods for preventing HPV infection, the most appropriate time or age to be vaccinated,
  - Factors predictive of the intention and decision to be vaccinated against HPV (questions from the Health Belief (HBM) and Theory of Planned Behaviour (TPB) models) (Q5):

1- perceived susceptibility (thinking one is at risk of developing an HPV infection),

2- perceived severity (thinking that HPV-related infections are serious diseases),

3- perceived benefits (knowing that the HPV vaccine can prevent cervical cancer/anal cancer/genital warts),

4- perceived barriers (believing in negative consequences of vaccination on future health),

5- cues to action (doctor's recommendation),

6- attitude (thinking that getting vaccinated against HPV is a good idea),

7- subjective norms (‘What do most people who mean a lot to me think about vaccination against HP?’).

**At T1, between 15 days and one month after the intervention**, the adolescents are asked to complete new questionnaires consisting of two sections identical to the questionnaires completed at T0 on knowledge of the HPV vaccine and HPV-related diseases (Q4) and on factors predictive of intention and decision regarding HPV vaccination (Q5).

A specific questionnaire on adolescents' discussions with their family, peers, friends and clinician is also given to adolescents (Q6). A specific questionnaire on pupils' opinions of comic is given to pupils in group III classes (Q7).

**At T2, six to eight months after the intervention**, the adolescents are asked whether they have been vaccinated or whether they intend to do so, with whom they have discussed about it, and what led them to make this decision. They are also asked to complete a new questionnaire identical to the one completed at T1 (i.e. Q4 and Q5, one month after the intervention).

At T2, the parents are contacted to gather information about the perceived impact of the intervention on adolescent and their opinion of the intervention.
